# Supplementary material for: Evolution and development of the adelphophagic, intracapsular Schmidt’s larva of the nemertean Lineus ruber
Source: Springer Nature journal article supplement (doi:10.1186/s13227-015-0023-5), 2015-09-27

A

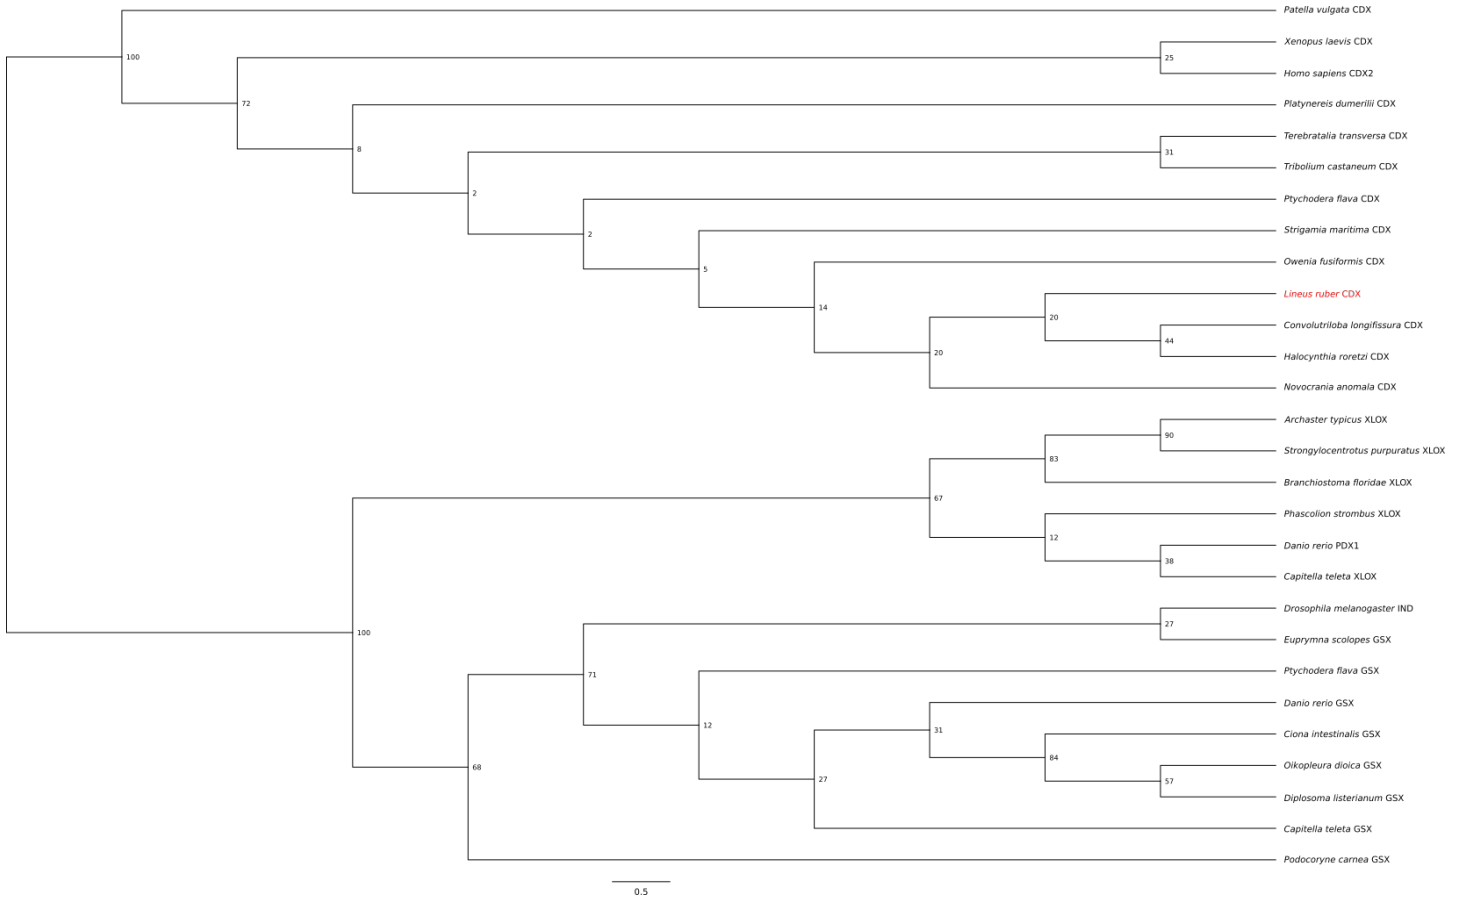

B

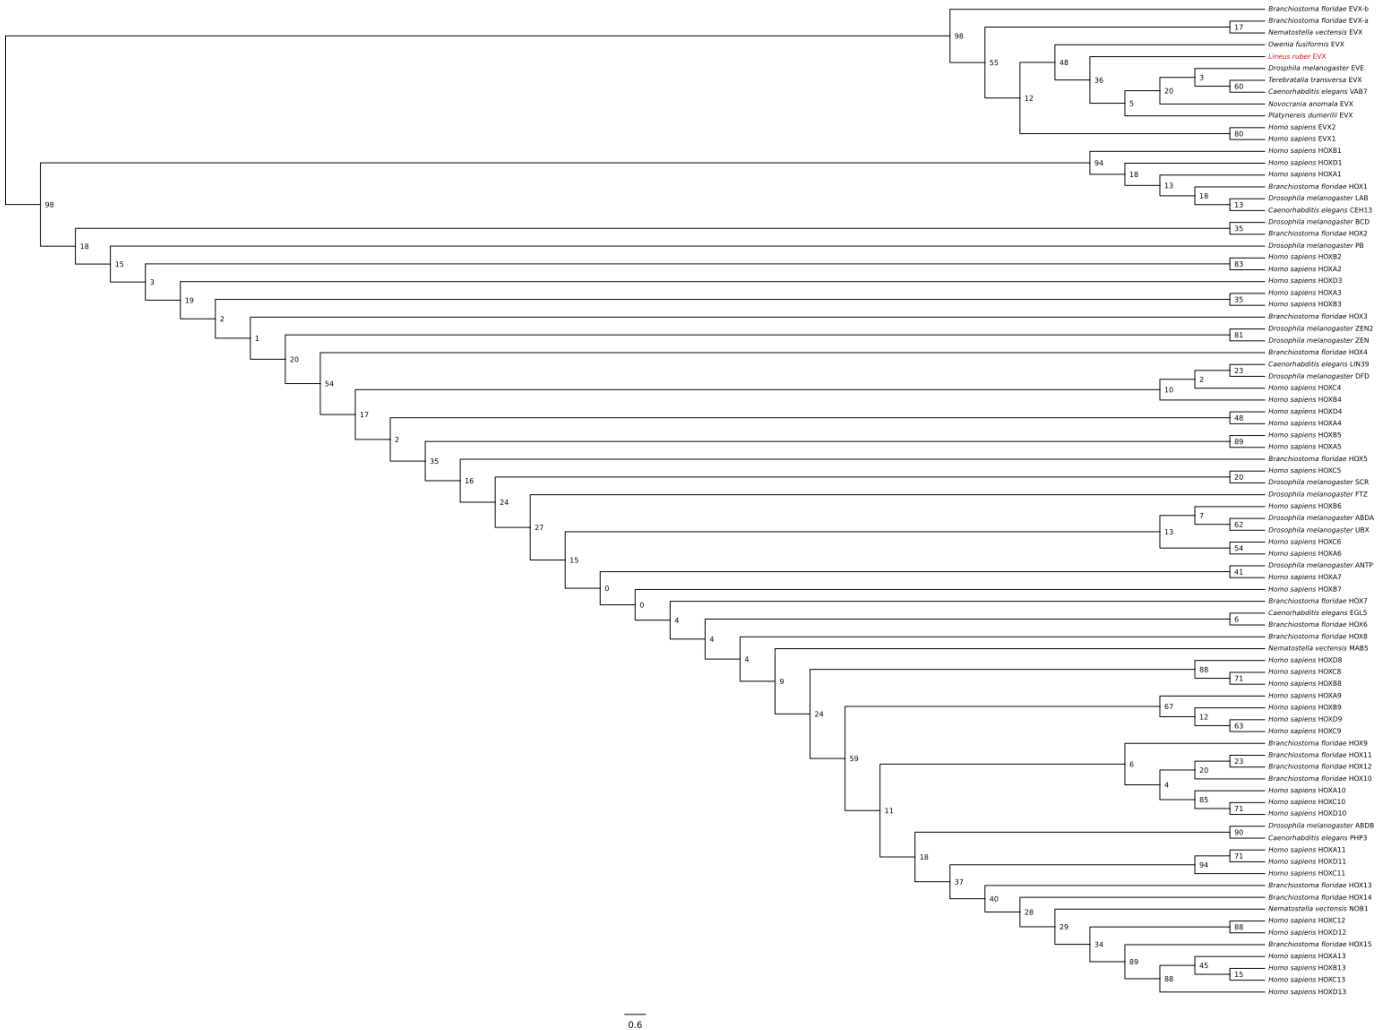

C

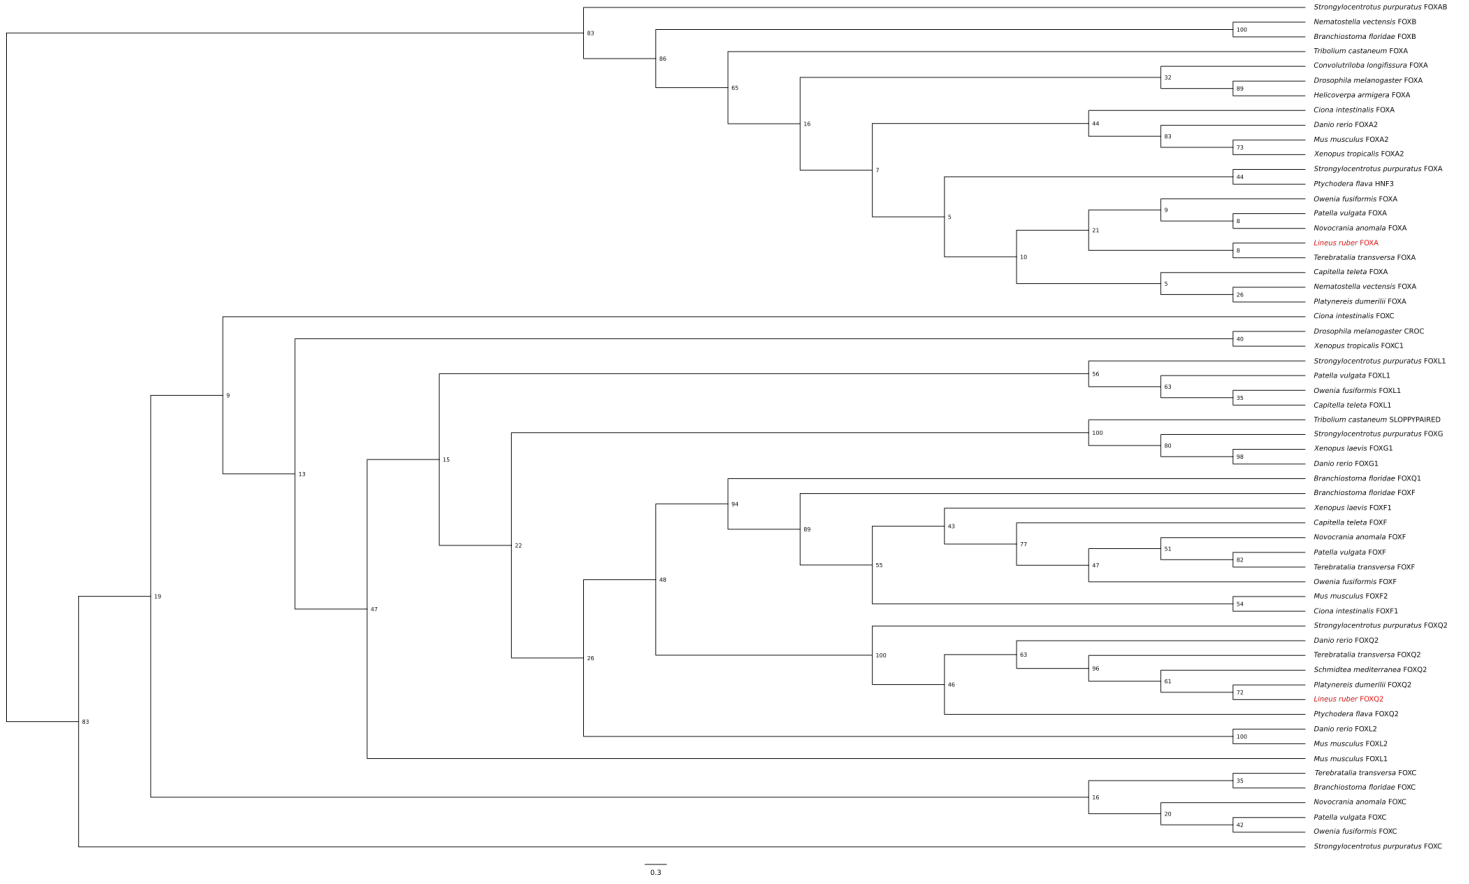

D

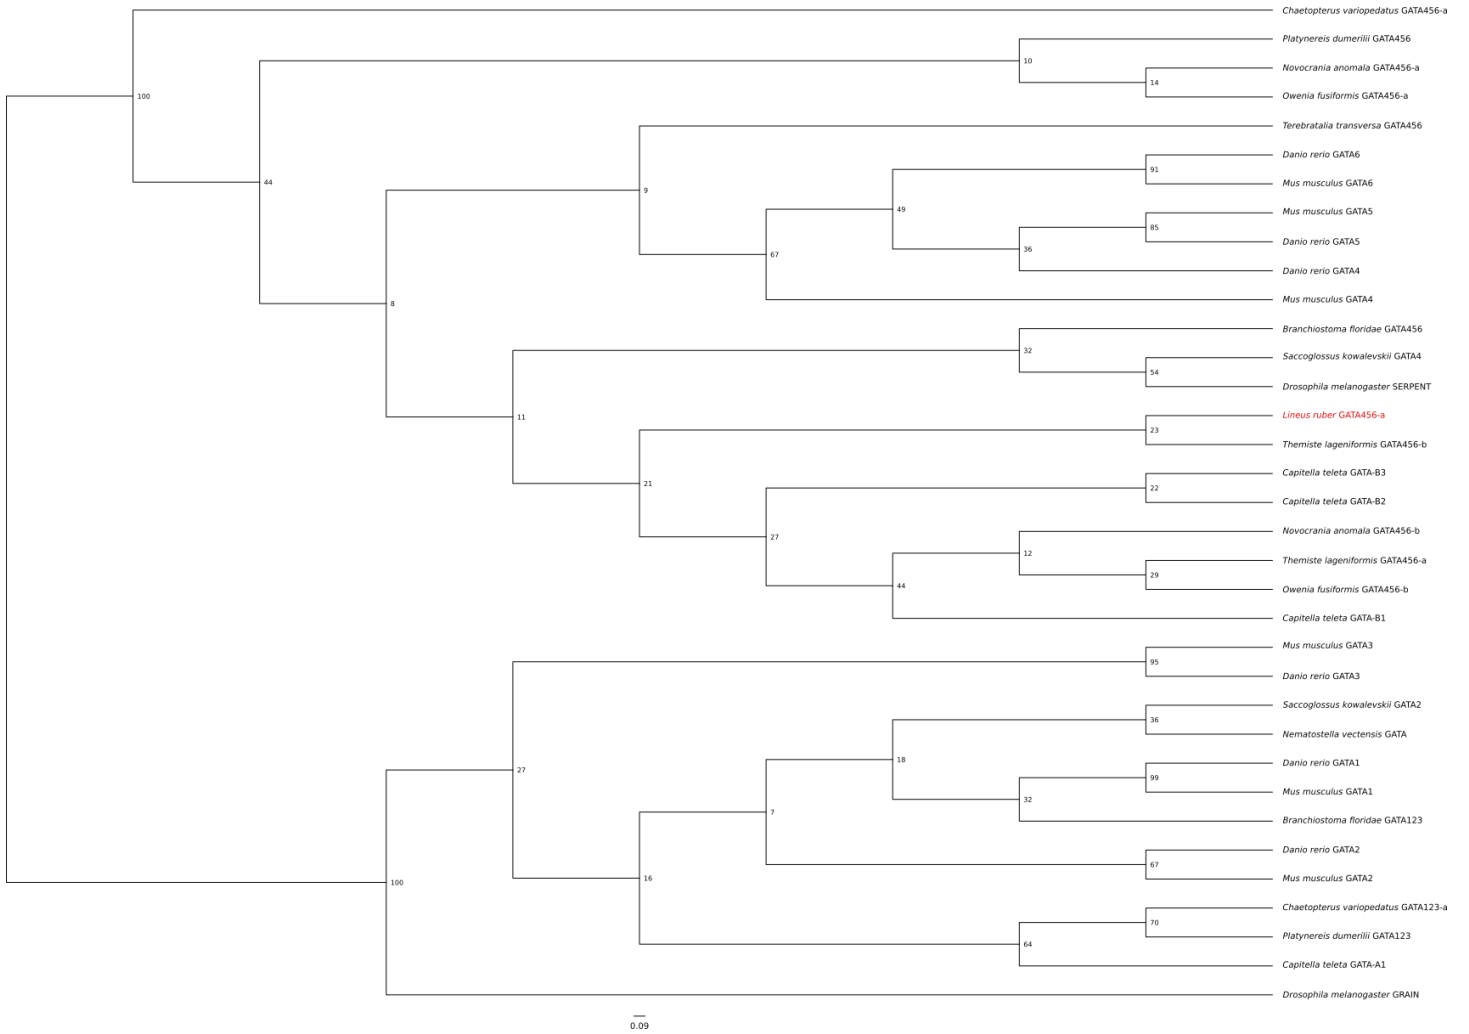

E

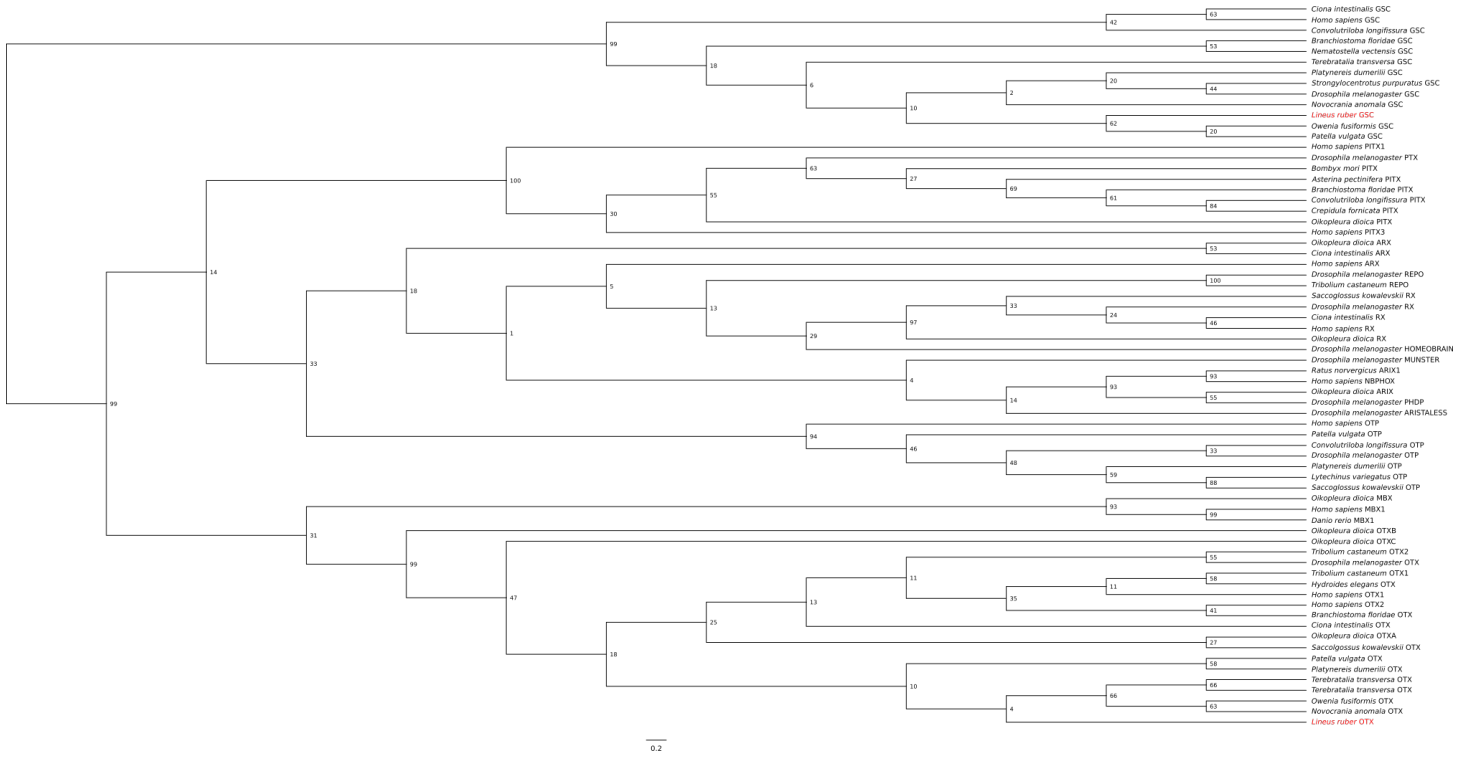

F

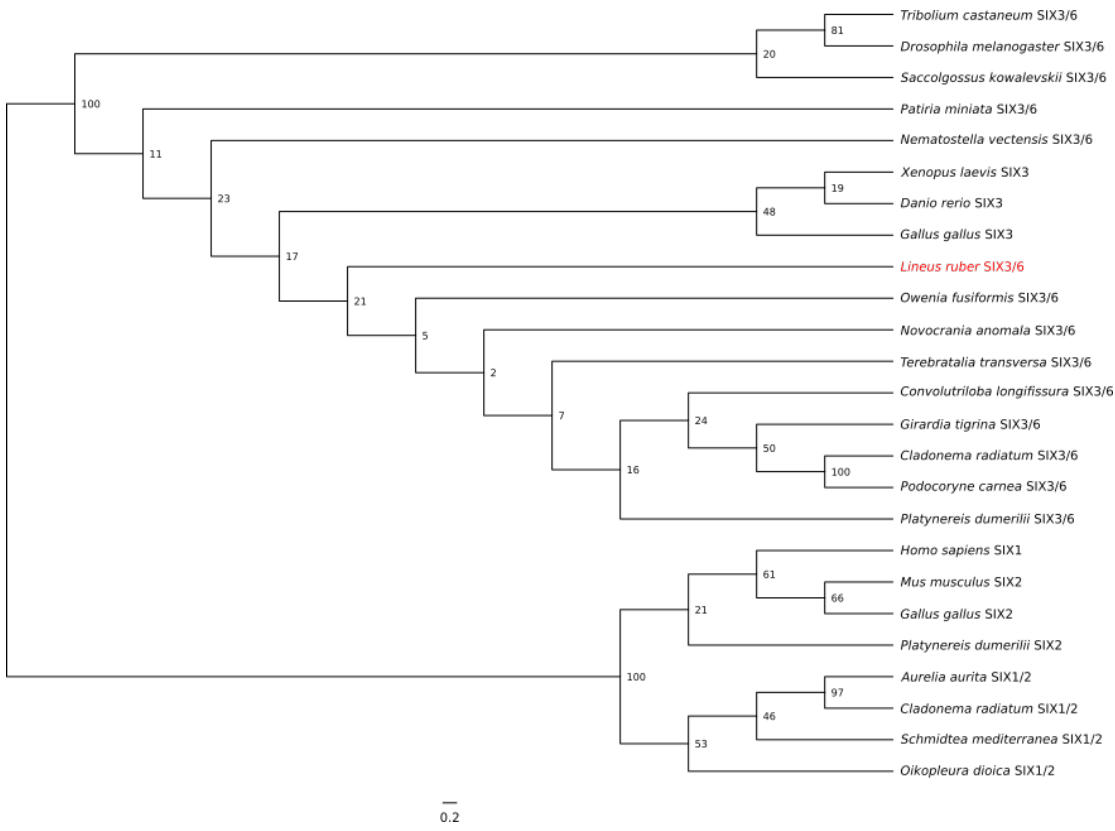

G

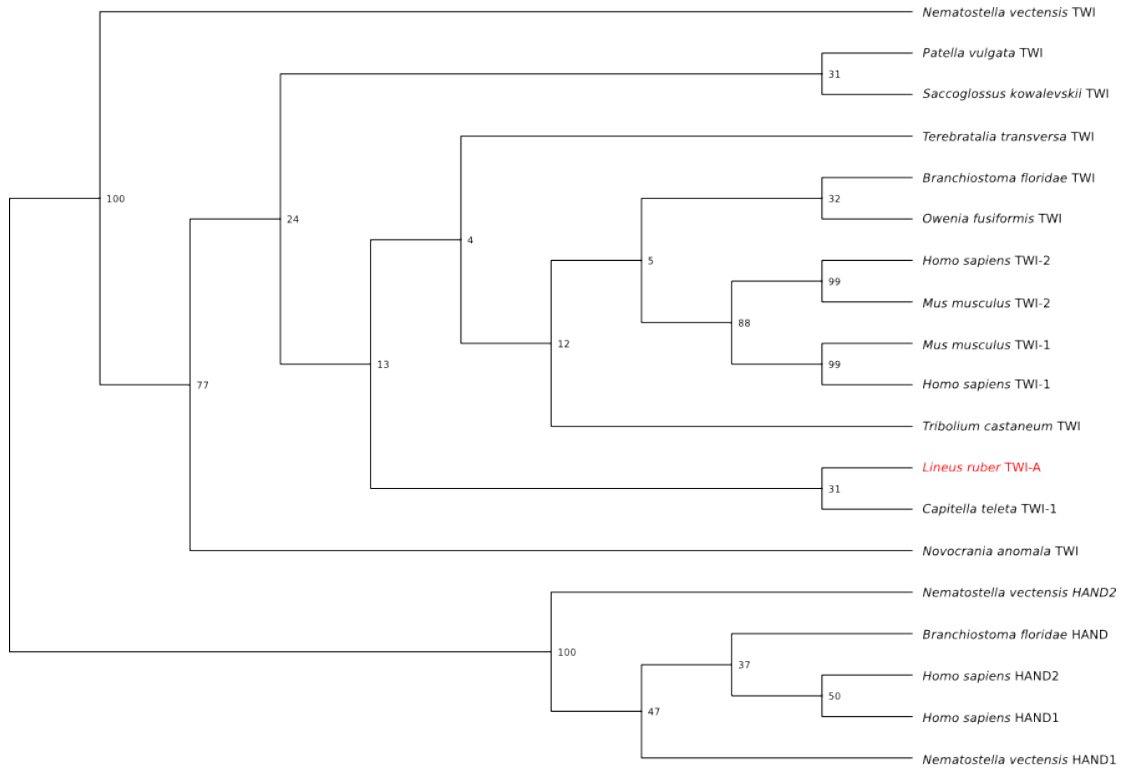

Supplement: MOESM2 [file 13227_2015_23_MOESM2_ESM.pdf]
